# Supplementary material for: Comprehensive Landscape of BRAF Variant Classes, Clonalities, and Co-Mutations in Metastatic Colorectal Cancer Using ctDNA Profiling
Source: MDPI journal article supplement (doi:10.3390/cancers16040737), 2024-02-09
Supplement: s1 [file s1]

Table S1: Summary of the clinical cohort patients' characteristics

|                        |                          | N (%)       |
|------------------------|--------------------------|-------------|
| Age, median (range)    |                          | 55 (31, 94) |
| Ethnicity              | Caucasian                | 30 (81.1%)  |
|                        | Hispanic                 | 5 (13.5%)   |
|                        | African American         | 1 (2.7%)    |
|                        | Asian                    | 1 (2.7%)    |
| Sex                    | F                        | 19 (50%)    |
|                        | M                        | 19 (50%)    |
| Primary Location       | ascending                | 4 (10.5%)   |
|                        | cecum                    | 5 (13.2%)   |
|                        | rectal                   | 17 (44.8%)  |
|                        | sigmoid                  | 9 (23.7%)   |
|                        | transverse               | 3 (7.9%)    |
| Side                   | left                     | 26 (74.3%)  |
|                        | right                    | 9 (25.7%)   |
| Lines of Treatment     | 1                        | 6 (15.8%)   |
|                        | 2                        | 14 (36.8%)  |
|                        | 3                        | 7 (18.4%)   |
|                        | 4                        | 10 (26.3%)  |
|                        | 5                        | 1 (2.6%)    |
| Peritoneum involved    | No                       | 27 (73%)    |
|                        | Yes                      | 10 (27%)    |
| Liver involved         | No                       | 11 (29.7%)  |
|                        | Yes                      | 26 (70.3%)  |
| Lung involved          | No                       | 15 (40.5%)  |
|                        | Yes                      | 22 (59.5%)  |
| Lymph node             | No                       | 17 (45.9%)  |
|                        | Yes                      | 20 (54.1%)  |
| Other site             | No                       | 30 (81.1%)  |
|                        | yes; bone, ovary         | 1 (2.7%)    |
|                        | yes; ovary               | 2 (5.4%)    |
|                        | yes; bone                | 4 (10.8%)   |
| Metastasectomy         | No                       | 28 (73.7%)  |
|                        | Yes                      | 10 (26.3%)  |
| Site of Metastasectomy | liver                    | 5 (50%)     |
|                        | lung                     | 3 (30%)     |
|                        | ovary                    | 1 (10%)     |
|                        | peritoneal/pelvic nodule | 1 (10%)     |
| Anti-EGFR treatment    | No                       | 25 (65.8%)  |
|                        | Yes                      | 13 (34.2%)  |
